## Effects of a multimedia campaign on HIV self-testing and PrEP outcomes among young people in South Africa: A mixed-methods impact evaluation of ‘MTV Shuga Down South’

Isolde Birdthistle<sup>1§</sup>, Sarah Mulwa<sup>1</sup>, Sophie Sarrassat<sup>1</sup>, Venetia Baker<sup>1</sup>, David Khanyile<sup>2</sup>, Dominique O’Donnell<sup>2</sup>, Cherie Cawood<sup>2\*</sup> & Simon Cousens<sup>1\*</sup>

1. Faculty of Epidemiology & Population Health, London School of Hygiene & Tropical Medicine, Keppel Street, London WC1E 7HT, United Kingdom
2. Epicentre Health Research, Hillcrest, Durban, KwaZulu-Natal 3610, South Africa

<sup>§</sup>Corresponding author: Isolde Birdthistle  
Keppel Street  
London, WC1E 7HT, United Kingdom  
[Isolde.Birdthistle@lshtm.ac.uk](mailto:Isolde.Birdthistle@lshtm.ac.uk)

\* These authors have contributed equally to the work, for shared last authorship.

E-mail addresses of authors:

IB: [Isolde.Birthistle@lshtm.ac.uk](mailto:Isolde.Birthistle@lshtm.ac.uk)  
SM: [Sarah.Mulwa@lshtm.ac.uk](mailto:Sarah.Mulwa@lshtm.ac.uk)  
SS: [Sophie.Sarrassat@lshtm.ac.uk](mailto:Sophie.Sarrassat@lshtm.ac.uk)  
VB: [Venetia.Baker1@lshtm.ac.uk](mailto:Venetia.Baker1@lshtm.ac.uk)  
DK: [davidk@epicentre.org.za](mailto:davidk@epicentre.org.za)  
DO: [domo@epicentre.org.za](mailto:domo@epicentre.org.za)  
CC: [cheriec@epicentre.org.za](mailto:cheriec@epicentre.org.za)  
SC: [Simon.Cousens@lshtm.ac.uk](mailto:Simon.Cousens@lshtm.ac.uk)

Keywords: HIV prevention, adolescents, young people, media, evaluation, South Africa

## 1 ABSTRACT

2  
3 **Introduction:** Innovative HIV technologies can help to reduce HIV incidence, yet uptake of  
4 such tools is relatively low among young people. To create awareness and demand among  
5 adolescents and young adults, a new campaign of the pan-African MTV Shuga series (“Down  
6 South 2”; DS2), featured storylines and messages about HIV self-testing (HIVST) and pre-  
7 exposure prophylaxis (PrEP) through television, radio and accompanying multimedia  
8 activities in 2019-2020.

9  
10 **Methods:** We conducted a mixed-methods evaluation of the new MTV Shuga series among  
11 15-24 year-olds in Eastern Cape, South Africa, in 2020. A web-based survey, promoted via  
12 social media platforms of schools, universities, and communities, assessed exposure to MTV  
13 Shuga and knowledge of HIV status; secondary outcomes included awareness and uptake of  
14 HIVST and PrEP. An embedded qualitative evaluation explored mechanisms of MTV Shuga’s  
15 impact through in-depth individual and group interviews.

16  
17 **Results:** Among 3,431 online survey participants, 43% had engaged with MTV Shuga and  
18 24% with DS2 specifically. Knowledge of HIV status was higher among those exposed to DS2  
19 (58%) versus those who were not (35%; adjusted OR=2.06 [95% CI:1.64-2.58]). Exposure was  
20 also associated with increased awareness of HIVST (60% vs 28%; aOR=1.99[1.61-2.47]) and  
21 use of HIVST (29% vs 10%; aOR=2.49[1.95-3.19]). One-third of respondents were aware of  
22 PrEP, with higher proportions among those exposed versus non-exposed to DS2 (52% vs  
23 27%; aOR=1.90[1.53-2.35]). Qualitative insights identified mechanisms by which DS2  
24 increased awareness, confidence and motivation to use HIVST and PrEP, but had less  
25 influence on service access.

26  
27 **Conclusions:** We found evidence consistent with a positive causal impact of the MTV Shuga  
28 DS2 campaign on HIV prevention outcomes among young people in a high-prevalence  
29 setting. As diverse testing and PrEP technologies become accessible, an immersive  
30 edutainment campaign can help to expand HIV prevention choices and close age and gender  
31 gaps in HIV testing and prevention goals.

## 32 Introduction

33 Biomedical innovations in HIV prevention are expanding the options and tools to avoid HIV  
34 acquisition and accelerate declines in HIV incidence. By diversifying HIV testing choices, HIV  
35 self-test (HIVST) kits have enabled more people to know their HIV status and access  
36 pathways into treatment and prevention.[1] Confirmation of positive status can link those  
37 living with HIV/AIDS to life-saving treatment, viral suppression and improved health, while  
38 reducing onward transmission.[2] Knowledge of negative HIV status can link individuals to  
39 prevention services, including highly efficacious pre-exposure prophylaxis (PrEP), to remain  
40 uninfected.

41  
42 New tools like HIVST and PrEP can be particularly valuable for young people, an important  
43 demographic group for HIV epidemic control and the least likely to know their HIV status.[2]  
44 As yet, no country in sub-Saharan Africa has achieved the first step of the UNAIDS  
45 “90:90:90” targets for the HIV treatment cascade (90% knowledge of status) among 15-24  
46 year-olds, despite significant gains in diagnostic coverage overall.[3] This represents a  
47 missed opportunity for early diagnosis to avoid illness and transmission, and for more young  
48 people to avail themselves of high-impact prevention options like PrEP.[4, 5]

49  
50 When offered HIV self-testing in the context of research studies, young people have  
51 welcomed the opportunity to test in private, without the judgment, stigma or discrimination  
52 they often face in facility-based services.[6-8] In real-world conditions, relatively few young  
53 people are aware of or utilising HIVST.[9] Similarly, while research has shown PrEP to be an  
54 acceptable HIV prevention method for young men and women, awareness and uptake of  
55 PrEP via national programmes is lower than expected, and annual growth has slowed over  
56 time since 2016.[10-13] Identifying ways to expand the reach and engagement of young  
57 people in HIV prevention, particularly testing services and PrEP, has become a priority for  
58 HIV epidemic control.[1, 3]

59  
60 MTV Shuga is a multimedia campaign based around a popular dramatic series that promotes  
61 HIV prevention and positive sexual health messaging with entertaining storylines and  
62 characters. Since the first series based in Nairobi in 2009, MTV Shuga has been broadcast on  
63 179 terrestrial channels reaching an estimated 719 million households. All episodes are  
64 available rights-free on internet platforms and MTV Staying Alive Foundation estimates 42  
65 million people have been reached through social media.[14] In 2019-2020, a new series  
66 entitled ‘Down South 2’ was produced in South Africa and incorporated storylines designed  
67 to increase awareness and demand for HIV testing, including self-testing, and PrEP in ways  
68 that resonate with young people. The show was complemented by wrap-around, “360-  
69 media” activities including a radio series, documentary films, and online resources.[14]  
70 (Figure S1) In the town of Mthatha in Eastern Cape, South Africa, peer-education and  
71 community events and a graphic novel distributed through schools enabled opportunities  
72 for offline engagement among those underserved by television and internet.

73  
74 To date, the efficacy of MTV Shuga has been demonstrated in a cluster-randomised trial of  
75 community viewings in Nigeria, which showed a positive impact on HIV and STI testing.[15]  
76 However, evidence of effectiveness in non-trial conditions is limited.[16, 17] We sought to  
77 evaluate the impact of MTV Shuga Down South on HIV prevention outcomes, including  
78 awareness and uptake of HIVST and PrEP, among young people in South Africa.

79

## 80 **Methods**

81

82 A mixed-methods evaluation was conducted in 2020 to determine whether and how MTV  
83 Shuga Down South 2 (DS2) impacted HIV prevention outcomes among young people. All  
84 research activities were conducted remotely to avoid risk of SARS-CoV-2 transmission.

85

86 First, an online survey was hosted on a website, free of charge for users through reverse-  
87 charging arrangements with the service provider. Those who completed the survey received  
88 mobile data credit of SAR50 transferred to a phone number provided for this purpose only.  
89 The survey was open to 15-24 year-old males and females and promoted through virtual  
90 marketing on Facebook, Instagram, and social media platforms of schools, universities,  
91 community groups and clinics in Mthatha, Eastern Cape. This setting was targeted due to:  
92 recent distribution of HIV self-testing kits and availability of oral PrEP (ensuring a supply to  
93 meet any demand generated by the DS2 campaign);[18] availability of the offline  
94 components of the DS2 campaign, described above; less HIV prevention research and lower  
95 HIV testing levels in Eastern Cape relative to other provinces; and the recommendation of  
96 the South African Department of Health.

97

98 The self-administered questionnaire ([File S1](#)) was anonymised with no name or other  
99 personal identifying information requested and questions designed to measure exposure to  
100 the MTV Shuga DS2 campaign (primary exposure) and any other MTV Shuga campaign  
101 (secondary exposure). The primary outcome was knowledge of HIV status, i.e., the  
102 proportion who tested for HIV in the past year and received the result, or ever tested HIV  
103 positive. Secondary outcomes included awareness, willingness to use, and uptake of HIVST  
104 and PrEP.

105

106 We constructed a directed acyclic graph (DAG) to represent the hypothesised causal  
107 relationship between intervention exposure, the study outcomes, and other socio-  
108 demographic characteristics.[19] ([Figure S2](#)) The DAG was interrogated to identify the  
109 minimal set of constructs needed to control for confounding. We calculated the proportion  
110 of respondents who knew their HIV status, and each secondary outcome, by exposure to  
111 DS2, and estimated associations between the intervention and outcomes using  
112 multivariable logistic regression to adjust for confounding variables informed by the DAG.  
113 Interaction terms were included where there was evidence of effect modification by age or  
114 gender. Each logistic regression model was restricted to individuals with non-missing  
115 responses for each outcome of interest.

116

117 A sample of participants who reportedly engaged with DS2 (watched or listened to at least  
118 one episode on TV, internet or radio) and opted into further research were invited to  
119 participate in an embedded qualitative evaluation to explore mechanisms of MTV Shuga's  
120 impact. Qualitative research activities included in-depth interviews (18 female, 13 male) and  
121 six group discussions, held in age- and gender-specific groups of 4-6 participants. Topic  
122 guides ([Files S2, S3](#)) were based on the 'COM-B' behavioural wheel model to explore MTV  
123 Shuga DS2's influence on participants' capability, opportunity, and motivation to adopt  
124 attitudes and behaviours supportive of HIVST and PrEP.[20] Video clips with DS2 scenes

125 about HIVST and PrEP were shown to generate discussion. Trained researchers who were  
126 bilingual (in either isiXhosa or Zulu and English), and aged under 30 years, facilitated the  
127 individual and group interviews via phone, Zoom or WhatsApp. Participants received data  
128 transfers in advance, to facilitate participation, and SAR100 airtime credit upon completion.  
129 Researchers transcribed all interviews into English and transcripts were analysed using a  
130 hybrid (deductive and inductive) thematic coding process.[21] Deductive codes were  
131 generated around the three conditions of the COM-B behavioural framework. A stage of  
132 open coding was conducted to allow other mechanisms of influence to emerge inductively.

133

### 134 **Research Ethics Statement**

135 Ethics approvals were received by the University of KwaZulu-Natal, London School of  
136 Hygiene & Tropical Medicine, and the World Health Organisation. Participants provided  
137 online consent and parents or guardians provided consent for participants under 18 years.

138

### 139 **Patient and Public Involvement**

140 Members of the public are engaged in the dissemination and discussion of results, via social  
141 media platforms and a public webinar on MTV Shuga evidence.

142

## 143 **Results**

144

### 145 **Online Survey**

#### 146 *Characteristics of the survey sample*

147 The web-based survey was available online from September to December 2020, during  
148 which 4,145 records were created. After removing records without full consent (n=407) or  
149 gender (n=144), and likely duplicates (n=163), 3,431 (83%) records were taken forward for  
150 analysis.(Table 1) Of those, respondents were predominantly female (59%), aged 20-24  
151 years (69% versus 31% aged 15-19), and spoke isiXhosa at home (80%). Most respondents  
152 (83%) were enrolled in education, including 34% in university, 28% in technical/vocational  
153 college, and 21% in primary or secondary school, while 3.1% were employed and 10.4%  
154 unemployed. The majority resided in urban settings (85%), primarily in Mthatha town (72%)  
155 or elsewhere in Eastern Cape province (11%), while 16% lived in other provinces of South  
156 Africa (6%, 4% and 3% in Western Cape, Gauteng, and KwaZulu-Natal, respectively). About  
157 40% of participants reported experiencing food insecurity (going to bed hungry in the past  
158 month) either sometimes, often or always.

159

160 Most participants lived in a household with a television (83%), internet (75%), radio (72%),  
161 and a computer or other digital device (57%); household ownership of all these was higher  
162 among older (20-24 year-olds) than younger respondents (15-19 year-olds).(Table 2) Most  
163 respondents owned their own smartphone (85% for both age groups), while about half  
164 owned their own computer and fewer (35%) owned a radio. Digital media engagement was  
165 high with 86% using the internet and social media platforms at least once a week, most  
166 commonly Facebook (72%), YouTube (44%), and Instagram (37%). Fewer than 1% reported  
167 never using the internet or social media. Most watched TV (74%) and listened to the radio  
168 (62%) at least weekly. Use of all media types was higher among older than younger  
169 respondents, although data were more often missing among the younger group.

170

171 *Reported sexual experience*

172 Similarly, younger respondents were more likely to skip questions about sex and  
173 relationships: 31% of younger and 20% of older participants did not answer if they had ever  
174 had sex.(Table 2) Of those who responded, 43% of younger and 53% of older respondents  
175 reported ever having had sex, and 38% of younger and 47% of older respondents were  
176 currently in a relationship. A small minority (3%) had ever been married or co-habited with a  
177 partner. Among those who answered the questions, females were more likely than males to  
178 report ever having had sex (54% vs 45%), and being in a relationship (48% vs 41%).  
179 However, female respondents were more likely than males to skip questions about sex and  
180 relationships: 21% of female participants and 16% of males did not answer both questions.

181

182 *Exposure to MTV Shuga Down South 2 and other MTV Shuga campaigns*

183 Almost one-quarter (24%) of all respondents reported engagement with the campaign  
184 linked to the most recent MTV Shuga series: ‘Down South Season 2’ (DS2): 29% of the  
185 younger and 22% of older respondents.(Table 3) Engagement most often involved attending  
186 a peer educator-led group discussion about DS2 (15%), followed by watching the affiliated  
187 ‘In Real Life’ documentary (11%), reading the DS2 graphic novel (10%), attending a DS2  
188 community event (9%), and watching DS2 on television (TV) or the internet and identifying it  
189 as season 2 (7%). Only a small proportion reported listening to DS2 on the radio (2%).

190

191 Overall, 43% (50% of the younger and 40% of the older respondents) had engaged with any  
192 MTV Shuga campaign.(Table 3) This included 30% of all respondents who ever watched  
193 ‘MTV Shuga Down South’ (either season 1 or 2) on TV or internet; 25% who watched the  
194 MTV preview show ‘16 and Pregnant’; 17% who watched MTV public service  
195 announcements related to Down South; as well as those who listened to either season 1 or  
196 2 of Down South on the radio (10%), watched the COVID-19 related ‘Alone Together’ mini-  
197 series (8%), or interacted with the campaign by posting comments about an episode on  
198 social media (9%), answering a phone-based polling question (8%), or searching the MTV  
199 Shuga website (6%).

200

201 Engagement with MTV Shuga was higher among younger respondents (15-19 year-olds  
202 versus 20-24 year-olds) for the DS2 series specifically and any MTV Shuga campaign more  
203 broadly, and for all media formats and engagement activities.(Tables 4, S1) Exposure to MTV  
204 Shuga was also higher among females versus males, and to a lesser extent, those in school  
205 or university compared to those in technical/vocational colleges or out-of-school; and those  
206 who speak English or Zulu at home, compared to isiXhosa. Exposure was much higher  
207 among those who had ever been sexually active compared to those who had not, and for  
208 those currently in a relationship (for both DS2 and any MTV Shuga campaign).

209

210 *HIV outcomes and associations with MTV Shuga exposure*

211 About 40% of respondents said they were aware of their HIV status, either because they had  
212 ever tested HIV-positive (~11%; 136 out of 1294 who knew their status) or because they had  
213 tested in the past year and received their result.(Table 5) Knowledge of HIV status was  
214 higher among those who were exposed to MTV Shuga DS2 (58%) compared to those who  
215 were not (35%) (adjusted odds ratio (aOR)=2.06 [95% confidence interval 1.64-2.58]), after  
216 controlling for possible confounders, including alternative sources of HIV information.(Table  
217 5, Figure 1a, Table S2) The association between DS2 exposure and knowledge of HIV status

218 was stronger among older respondents (aOR=2.61) than younger respondents (aOR=1.60;  
219  $p<0.001$  for test of interaction by age group).

220

221 The proportion of respondents who had ever heard of HIV self-testing was also higher  
222 among those exposed to DS2 versus the non-exposed (60% vs 28%; aOR=1.99 [1.61-2.47]),  
223 with a stronger effect size among older versus younger respondents ( $p<0.001$ ). (Table 5,  
224 Figure 1a) The proportions who had used an HIV self-test, either ever in their lifetime (29%  
225 vs 10%; aOR=2.49 [1.95-3.19]) or within the past year (21% vs 7%; aOR=2.61 [1.97-3.47])  
226 were higher among those exposed versus non-exposed to DS2, with no evidence of a  
227 difference by age group. Among those who had never used an HIV self-test before, interest  
228 in using a self-test was high overall (83%), and association with DS2 exposure differed by  
229 age group: specifically, exposure to DS2 was associated with more interest in HIV self-  
230 testing among younger respondents (aOR=1.66 [1.05-2.64]) and with less interest among  
231 older respondents (aOR=0.50 [0.34-0.72]). Similarly, interest in giving an HIV self-test kit to a  
232 partner was high, with DS2 exposure associated with more interest among younger  
233 respondents (aOR=1.84 [1.13-3.0]) and with less interest among the older (aOR=0.52 [0.36-  
234 0.77]), compared to the non-exposed.

235

236 One-third of respondents were aware of PrEP, with higher proportions aware of PrEP among  
237 those exposed versus not exposed to DS2 (52% vs 27%; aOR=1.90 [1.53-2.35]). Demand for  
238 PrEP (i.e., willingness to take PrEP every day) was high overall with weak evidence of higher  
239 demand among those exposed to DS2 (85% vs 80% among non-exposed; aOR=1.31 [0.97-  
240 1.76]), and no differences by age group. (Table 5, Table S2)

241

242 Respondents who were exposed to DS2 were more likely to have had sex, ever in their  
243 lifetime (74% vs 44% of the non-exposed; aOR=2.86 [2.19-3.72]) and in the past 12 months  
244 (64% vs 37%); aOR=2.13 [1.65-2.74]), than non-exposed respondents. This was particularly  
245 true for older respondents, with those exposed to DS2 much more likely to have ever had  
246 sex than those not exposed (aOR=8.05 [5.57-11.65]). Among those who reported sex within  
247 the past 12 months, DS2 audiences were more likely to report condom use at last sex than  
248 those not exposed to DS2 (66% vs 59%; aOR=1.42 [1.07-1.89]). (Table 5, Table S2)

249

250 In sensitivity analyses in which multiple imputation was conducted for all participants with  
251 missing values, results were consistent with the complete case analysis. (Table S3) In analysis  
252 of the secondary exposure measure (exposure to any MTV Shuga campaign, including but  
253 not limited to DS2), most outcomes were more common among those exposed to any MTV  
254 Shuga compared to those with no MTV Shuga exposure of any kind, and associations  
255 between exposure and outcomes were similar to those observed with exposure to MTV  
256 Shuga DS2 specifically. (Table 5B, Figure 1b)

257

258 In more detailed reports of HIV testing experiences, those exposed to DS2 accessed HIV  
259 testing services more frequently than those not exposed (ever and within the past year).  
260 (Table S4) This was true of HIV self-testing as well as testing with a community health  
261 worker and within ante-natal care services (for females). HIV self-test kits were accessed  
262 from a range of outlets, most often government clinics, community health centres, or  
263 hospitals, and university/TVET settings. Pharmacies were also a common source, particularly  
264 for younger (15-19 year-old) participants, and more so among young DS2 audiences (27%)

265 than those not exposed (17%). DS2 viewers were also more likely to have paid fees for their  
266 last self-test (36% vs 21% of non-exposed), among both age groups. Respondents cited a  
267 range of reasons for their last HIV self-test, with the most common motivation being to  
268 learn their HIV status (>80% of those who self-tested). Of those exposed to DS2, 32% of the  
269 younger respondents and 18% of older respondents cited MTV Shuga as the reason they got  
270 their most recent HIV self-test. Following their self-test, DS2 viewers were more likely than  
271 non-viewers to seek a laboratory test to confirm the result (66% vs 56% of self-testers).

272

### 273 **Qualitative research**

274

275 In analysis of qualitative data, themes emerged about the behavioural mechanisms through  
276 which MTV Shuga DS2 influenced participants' capability, motivation and opportunity  
277 related to HIV self-testing and PrEP outcomes. (Table S5) **Awareness** (an aspect of capability)  
278 of HIVST and PrEP was enhanced by watching the show, with some learning about these  
279 resources for the first time from DS2 – "*Honestly speaking, I didn't know about the self-*  
280 *testing until I watched the show now. I now know that you can test yourself*"– while others  
281 gained a greater understanding through the show: "*Before seeing the show, PrEP was just*  
282 *something I saw in books. I didn't know that it is actually out there.*" Participants expressed  
283 ways in which this understanding, and storylines (about Bongi and Arrabella living with HIV),  
284 helped to reduce their fear about HIV and knowing their own status, "*The show showed me*  
285 *that knowing your status is better than just living with an unknown status... [it] won't mean*  
286 *the end of the world.*" Some also gained **confidence** to enquire and learn more, e.g., from  
287 internet searches and approaching health service staff. Young people described how scenes  
288 and storylines from DS2 helped them feel more **prepared** to access HIV services: "*I know*  
289 *what I will be experiencing from the whole situation.*" This included participants who were  
290 not yet sexually active and felt better prepared for future relationships, "*Now that I have*  
291 *information about PrEP, it will help me when I meet someone. I will know what I need to do*  
292 *and know how PrEP will help me.*" Scenarios presented through the show also helped young  
293 people to **reflect** on their own needs and preferences for HIV prevention options, at  
294 different times of their life. After watching the show, some realised they prefer self-testing  
295 at home, for the privacy and convenience, while others would be more anxious testing at  
296 home and would prefer the support available at a clinic: "*For me, this thing of testing at*  
297 *home really scared me... At home, there will be no one to help you [after getting the*  
298 *results].*" Participants were also able to imagine scenarios in which they could use PrEP, e.g.,  
299 "*I like the fact that it protects you from getting HIV when your partner has tested positive,*"  
300 though some preferred to rely on condoms for HIV prevention. While capability and  
301 motivation were clearly enhanced for many, the show had less influence on **opportunity to**  
302 **access** services like HIVST and PrEP. While they saw ways in which they could get such  
303 resources, from the show, many doubted the availability in their own setting ("*I wouldn't be*  
304 *confident that if I go to the hospital, I'd get them. The hospitals here are not the same as*  
305 *those in Joburg.*"), especially during closures related to COVID-19 lockdowns.

306 The qualitative data also illustrated ways in which DS2 had a broader influence, beyond its  
307 immediate audience. (Table S6) It helped some viewers initiate conversations and discussion  
308 with partners and parents, with whom they said conversations about sex are often avoided  
309 or awkward, although some remained hesitant to engage in such discussions. Some young  
310 males described ways in which the show changed the tone of conversations with peers, to



311 more substantive discussions about PrEP and contraception. Many felt enlightened by the  
312 show and wished more young people would have access to the information about PrEP and  
313 HIV self-screening. Some felt that this should be done through more government and health  
314 campaigns, and many saw the role they themselves could play as educators and advocates  
315 for HIV testing and prevention: *“People are usually afraid of the pain and pricking when it*  
316 *comes to taking HIV test. So, I’ll definitely be an advocate for the self-screening HIV test now*  
317 *because of the show,”* and within their own family: *“I can be able to give my little brother*  
318 *advice on when he wants to date... Now I can explain to him how to be safe when he’s*  
319 *having sex, testing, everything.”*

320

321 Some participants said they were unaffected by the show and didn’t learn anything about  
322 PrEP and HIV self-testing. These topics featured in four different scenes (8 minutes of  
323 content) in the 10 episodes of the DS2 series, and some viewers missed those scenes, or  
324 were distracted at the time. Some were confused by the scenes and didn’t gain confidence  
325 or motivation to use PrEP or self-testing: *“Since they say HIV is something that is tested*  
326 *through blood, I kind of don’t understand what they are doing there [with HIV self-screening]*  
327 *’cause there’s only saliva inside the mouth.”*

328

329 **Table 1. Socio-demographic characteristics of online survey participants, overall and by**  
 330 **age group (N=3,431)**

|                                                                                         | Age group               |      |                         |      |                   |      |
|-----------------------------------------------------------------------------------------|-------------------------|------|-------------------------|------|-------------------|------|
|                                                                                         | 15-19 years<br>(N=1079) |      | 20-24 years<br>(N=2352) |      | Total<br>(N=3431) |      |
|                                                                                         | n                       | %    | n                       | %    | n                 | %    |
| <b>Socio-demographic characteristics</b>                                                |                         |      |                         |      |                   |      |
| <b>Gender</b>                                                                           |                         |      |                         |      |                   |      |
| Male                                                                                    | 372                     | 34.5 | 945                     | 40.2 | 1,317             | 38.4 |
| Female                                                                                  | 656                     | 60.8 | 1,364                   | 58.0 | 2,020             | 58.9 |
| Other                                                                                   | 51                      | 4.7  | 43                      | 1.8  | 94                | 2.7  |
| <b>Current schooling/employment status</b>                                              |                         |      |                         |      |                   |      |
| In school (primary/secondary)                                                           | 597                     | 55.3 | 129                     | 5.5  | 726               | 21.2 |
| TVET <sup>†</sup>                                                                       | 144                     | 13.3 | 823                     | 35.0 | 967               | 28.2 |
| University                                                                              | 228                     | 21.1 | 936                     | 39.8 | 1,164             | 33.9 |
| Employed                                                                                | 12                      | 1.1  | 94                      | 4.0  | 106               | 3.1  |
| Unemployed                                                                              | 49                      | 4.5  | 308                     | 13.1 | 357               | 10.4 |
| Unknown                                                                                 | 49                      | 4.5  | 62                      | 2.6  | 111               | 3.2  |
| <b>Language spoken at home</b>                                                          |                         |      |                         |      |                   |      |
| English                                                                                 | 99                      | 9.2  | 160                     | 6.8  | 259               | 7.5  |
| IsiXhosa                                                                                | 798                     | 74.0 | 1,947                   | 82.8 | 2,745             | 80.0 |
| Zulu                                                                                    | 100                     | 9.3  | 124                     | 5.3  | 224               | 6.5  |
| Other                                                                                   | 72                      | 6.7  | 119                     | 5.1  | 191               | 5.6  |
| Unknown                                                                                 | 10                      | 0.9  | 2                       | 0.1  | 12                | 0.3  |
| <b>Province</b>                                                                         |                         |      |                         |      |                   |      |
| Eastern Cape (EC) - Mthatha                                                             | 716                     | 66.4 | 1,746                   | 74.2 | 2,462             | 71.8 |
| Eastern Cape - O.R. Tambo                                                               | 24                      | 2.2  | 46                      | 2.0  | 70                | 2.0  |
| Eastern Cape - other EC                                                                 | 102                     | 9.5  | 192                     | 8.2  | 294               | 8.6  |
| Western Cape                                                                            | 57                      | 5.3  | 157                     | 6.7  | 214               | 6.2  |
| Kwa-Zulu Natal                                                                          | 65                      | 6.0  | 38                      | 1.6  | 103               | 3.0  |
| Gauteng                                                                                 | 56                      | 5.2  | 80                      | 3.4  | 136               | 4.0  |
| Other provinces                                                                         | 36                      | 3.3  | 47                      | 2.0  | 83                | 2.4  |
| Unknown                                                                                 | 23                      | 2.1  | 46                      | 2.0  | 69                | 2.0  |
| <b>Urban/Rural residence<sup>‡</sup></b>                                                |                         |      |                         |      |                   |      |
| Urban setting                                                                           | 891                     | 82.6 | 2,032                   | 86.4 | 2,923             | 85.2 |
| Rural setting                                                                           | 95                      | 8.8  | 192                     | 8.2  | 287               | 8.4  |
| Unknown                                                                                 | 93                      | 8.6  | 128                     | 5.4  | 221               | 6.4  |
| <b>Food insecurity</b>                                                                  |                         |      |                         |      |                   |      |
| Never/rarely                                                                            | 610                     | 56.5 | 1,268                   | 53.9 | 1,878             | 54.7 |
| Sometimes                                                                               | 319                     | 29.6 | 820                     | 34.9 | 1,139             | 33.2 |
| Often/always                                                                            | 72                      | 6.7  | 146                     | 6.2  | 218               | 6.4  |
| Unknown                                                                                 | 78                      | 7.2  | 118                     | 5.0  | 196               | 5.7  |
| <b>Called a helpline or searched for information on HIV on the internet<sup>§</sup></b> |                         |      |                         |      |                   |      |
| No                                                                                      | 485                     | 44.9 | 1,182                   | 50.3 | 1,667             | 48.6 |
| Yes                                                                                     | 422                     | 39.1 | 930                     | 39.5 | 1,352             | 39.4 |
| Unknown                                                                                 | 172                     | 15.9 | 240                     | 10.2 | 412               | 12.0 |

331 <sup>†</sup> TVET: Technical Vocational Educational and Training colleges

332 <sup>‡</sup> coding Mthatha to urban setting; <sup>§</sup> this measure includes the following sites/helplines: Bwise, Loveline,  
 333 Childline, but excludes MTV Shuga website

**Table 2. Media ownership and sexual experiences reported by online survey participants, overall and by age group and gender (N=3,431)**

|                               | 15-19 years     |      |                   |      |                 |      |                    |      | 20-24 years     |      |                     |      |                 |      |                    |      |
|-------------------------------|-----------------|------|-------------------|------|-----------------|------|--------------------|------|-----------------|------|---------------------|------|-----------------|------|--------------------|------|
|                               | Male<br>(N=372) |      | Female<br>(N=656) |      | Other<br>(N=51) |      | Total<br>(N=1,079) |      | Male<br>(N=945) |      | Female<br>(N=1,364) |      | Other<br>(N=43) |      | Total<br>(N=2,352) |      |
|                               | n               | %    | n                 | %    | n               | %    | n                  | %    | n               | %    | n                   | %    | n               | %    | n                  | %    |
| <b>Media assets</b>           |                 |      |                   |      |                 |      |                    |      |                 |      |                     |      |                 |      |                    |      |
| <b>Household ownership</b>    |                 |      |                   |      |                 |      |                    |      |                 |      |                     |      |                 |      |                    |      |
| Radio                         | 240             | 64.5 | 463               | 70.6 | 17              | 33.3 | 720                | 66.7 | 727             | 76.9 | 1,002               | 73.5 | 15              | 34.9 | 1,744              | 74.1 |
| Television (TV)               | 291             | 78.2 | 533               | 81.3 | 19              | 37.3 | 843                | 78.1 | 811             | 85.8 | 1,160               | 85   | 18              | 41.9 | 1,989              | 84.6 |
| Computer / device             | 200             | 53.8 | 334               | 50.9 | 11              | 21.6 | 545                | 50.5 | 589             | 62.3 | 801                 | 58.7 | 14              | 32.6 | 1,404              | 59.7 |
| Internet                      | 270             | 72.6 | 464               | 70.7 | 18              | 35.3 | 752                | 69.7 | 752             | 79.6 | 1,038               | 76.1 | 20              | 46.5 | 1,810              | 77.0 |
| TV subscription               | 184             | 49.5 | 352               | 53.7 | 10              | 19.6 | 546                | 50.6 | 428             | 45.3 | 657                 | 48.2 | 9               | 20.9 | 1,094              | 46.5 |
| Unknown                       | 33              | 8.9  | 51                | 7.8  | 1               | 2.0  | 85                 | 7.9  | 47              | 5.0  | 84                  | 6.2  | 2               | 4.7  | 133                | 5.7  |
| Household media assets index  |                 |      |                   |      |                 |      |                    |      |                 |      |                     |      |                 |      |                    |      |
| Low                           | 125             | 33.6 | 245               | 37.3 | 40              | 78.4 | 410                | 38   | 294             | 31.1 | 453                 | 33.2 | 26              | 60.5 | 773                | 32.9 |
| Medium                        | 111             | 29.8 | 168               | 25.6 | 2               | 3.9  | 281                | 26   | 330             | 34.9 | 433                 | 31.7 | 8               | 18.6 | 771                | 32.8 |
| High                          | 103             | 27.7 | 192               | 29.3 | 8               | 15.7 | 303                | 28.1 | 274             | 29.0 | 394                 | 28.9 | 7               | 16.3 | 675                | 28.7 |
| Unknown                       | 33              | 8.9  | 51                | 7.8  | 1               | 2.0  | 85                 | 7.9  | 47              | 5.0  | 84                  | 6.2  | 2               | 4.7  | 133                | 5.7  |
| <b>Personal ownership</b>     |                 |      |                   |      |                 |      |                    |      |                 |      |                     |      |                 |      |                    |      |
| Radio                         | 133             | 35.8 | 215               | 32.8 | 3               | 5.9  | 351                | 32.5 | 373             | 39.5 | 455                 | 33.4 | 10              | 23.3 | 838                | 35.6 |
| Smartphone                    | 322             | 86.6 | 573               | 87.3 | 18              | 35.3 | 913                | 84.6 | 813             | 86.0 | 1,179               | 86.4 | 17              | 39.5 | 2,009              | 85.4 |
| Computer / device             | 166             | 44.6 | 265               | 40.4 | 6               | 11.8 | 437                | 40.5 | 540             | 57.1 | 755                 | 55.4 | 12              | 27.9 | 1,307              | 55.6 |
| Unknown                       | 32              | 8.6  | 51                | 7.8  | 1               | 2.0  | 84                 | 7.8  | 899             | 95.1 | 1,279               | 93.8 | 41              | 95.3 | 2,219              | 94.3 |
| Individual media assets index |                 |      |                   |      |                 |      |                    |      |                 |      |                     |      |                 |      |                    |      |
| Low                           | 133             | 35.8 | 249               | 38   | 44              | 86.3 | 426                | 39.5 | 291             | 30.8 | 453                 | 33.2 | 27              | 62.8 | 771                | 32.8 |
| Medium                        | 125             | 33.6 | 246               | 37.5 | 5               | 9.8  | 376                | 34.8 | 342             | 36.2 | 500                 | 36.7 | 6               | 14   | 848                | 36.1 |
| High                          | 82              | 22   | 110               | 16.8 | 1               | 2.0  | 193                | 17.9 | 266             | 28.1 | 326                 | 23.9 | 8               | 18.6 | 600                | 25.5 |
| Unknown                       | 32              | 8.6  | 51                | 7.8  | 1               | 2.0  | 84                 | 7.8  | 46              | 4.9  | 85                  | 6.2  | 2               | 4.7  | 133                | 5.7  |
| How often do you watch TV     |                 |      |                   |      |                 |      |                    |      |                 |      |                     |      |                 |      |                    |      |
| Never                         | 8               | 2.2  | 17                | 2.6  | 3               | 5.9  | 28                 | 2.6  | 21              | 2.2  | 20                  | 1.5  | 3               | 7    | 44                 | 1.9  |
| Less than weekly              | 46              | 12.4 | 105               | 16   | 6               | 11.8 | 157                | 14.6 | 125             | 13.2 | 169                 | 12.4 | 4               | 9.3  | 298                | 12.7 |
| At least once per week        | 274             | 73.7 | 453               | 69.1 | 16              | 31.4 | 743                | 68.9 | 727             | 76.9 | 1,058               | 77.6 | 14              | 32.6 | 1,799              | 76.5 |

|                                             |     |      |     |      |    |      |     |      |     |      |       |      |    |      |       |      |
|---------------------------------------------|-----|------|-----|------|----|------|-----|------|-----|------|-------|------|----|------|-------|------|
| Unknown                                     | 44  | 11.8 | 81  | 12.3 | 26 | 51.0 | 151 | 14   | 72  | 7.6  | 117   | 8.6  | 22 | 51.2 | 211   | 9    |
| How often do you listen to the radio        |     |      |     |      |    |      |     |      |     |      |       |      |    |      |       |      |
| Never                                       | 45  | 12.1 | 79  | 12   | 6  | 11.8 | 130 | 12   | 55  | 5.8  | 113   | 8.3  | 6  | 14   | 174   | 7.4  |
| Less than weekly                            | 57  | 15.3 | 154 | 23.5 | 7  | 13.7 | 218 | 20.2 | 128 | 13.5 | 244   | 17.9 | 2  | 4.7  | 374   | 15.9 |
| At least once per week                      | 225 | 60.5 | 341 | 52   | 13 | 25.5 | 579 | 53.7 | 682 | 72.2 | 865   | 63.4 | 15 | 34.9 | 1,562 | 66.4 |
| Unknown                                     | 45  | 12.1 | 82  | 12.5 | 25 | 49.0 | 152 | 14.1 | 80  | 8.5  | 142   | 10.4 | 20 | 46.5 | 242   | 10.3 |
| How often do you use the internet           |     |      |     |      |    |      |     |      |     |      |       |      |    |      |       |      |
| Never                                       | 3   | 0.8  | 2   | 0.3  | 2  | 3.9  | 7   | 0.6  | 2   | 0.2  | 5     | 0.4  | 1  | 2.3  | 8     | 0.3  |
| Less than weekly                            | 19  | 5.1  | 65  | 9.9  | 6  | 11.8 | 90  | 8.3  | 33  | 3.5  | 47    | 3.4  | 2  | 4.7  | 82    | 3.5  |
| At least once per week                      | 314 | 84.4 | 527 | 80.3 | 19 | 37.3 | 860 | 79.7 | 851 | 90.1 | 1,223 | 89.7 | 19 | 44.2 | 2,093 | 89   |
| Unknown                                     | 36  | 9.7  | 62  | 9.5  | 24 | 47.1 | 122 | 11.3 | 59  | 6.2  | 89    | 6.5  | 21 | 48.8 | 169   | 7.2  |
| How often do you use social media platforms |     |      |     |      |    |      |     |      |     |      |       |      |    |      |       |      |
| Never                                       | 3   | 0.8  | 11  | 1.7  | 3  | 5.9  | 17  | 1.6  | 6   | 0.6  | 2     | 0.1  | 1  | 2.3  | 9     | 0.4  |
| Less than weekly                            | 19  | 5.1  | 40  | 6.1  | 5  | 9.8  | 64  | 5.9  | 45  | 4.8  | 45    | 3.3  | 2  | 4.7  | 92    | 3.9  |
| At least once per week                      | 316 | 84.9 | 540 | 82.3 | 19 | 37.3 | 875 | 81.1 | 838 | 88.7 | 1,231 | 90.2 | 19 | 44.2 | 2,088 | 88.8 |
| Unknown                                     | 34  | 9.1  | 65  | 9.9  | 24 | 47.1 | 123 | 11.4 | 56  | 5.9  | 86    | 6.3  | 21 | 48.8 | 163   | 6.9  |
| <b>Sexual experience</b>                    |     |      |     |      |    |      |     |      |     |      |       |      |    |      |       |      |
| <b>Relationship status</b>                  |     |      |     |      |    |      |     |      |     |      |       |      |    |      |       |      |
| Not in a relationship                       | 176 | 47.3 | 288 | 43.9 | 30 | 58.8 | 494 | 45.8 | 446 | 47.2 | 493   | 36.1 | 20 | 46.5 | 959   | 40.8 |
| In a relationship                           | 108 | 29   | 200 | 30.5 | 8  | 15.7 | 316 | 29.3 | 339 | 35.9 | 555   | 40.7 | 11 | 25.6 | 905   | 38.5 |
| Ever married/lived with someone             | 4   | 1.1  | 4   | 0.6  | 9  | 17.6 | 17  | 1.6  | 24  | 2.5  | 51    | 3.7  | 4  | 9.3  | 79    | 3.4  |
| Unknown                                     | 84  | 22.6 | 164 | 25   | 4  | 7.8  | 252 | 23.4 | 136 | 14.4 | 265   | 19.4 | 8  | 18.6 | 409   | 17.4 |
| <b>Ever had sex</b>                         |     |      |     |      |    |      |     |      |     |      |       |      |    |      |       |      |
| No                                          | 157 | 42.2 | 258 | 39.3 | 12 | 23.5 | 427 | 39.6 | 422 | 44.7 | 440   | 32.3 | 2  | 4.7  | 864   | 36.7 |
| Yes                                         | 110 | 29.6 | 208 | 31.7 | 4  | 7.8  | 322 | 29.8 | 368 | 38.9 | 627   | 46.0 | 13 | 30.2 | 1,008 | 42.9 |
| Prefer not to say                           | 22  | 5.9  | 27  | 4.1  | 33 | 64.7 | 82  | 7.6  | 26  | 2.8  | 41    | 3.0  | 23 | 53.5 | 90    | 3.8  |
| Unknown                                     | 83  | 22.3 | 163 | 24.8 | 2  | 3.9  | 248 | 23.0 | 129 | 13.7 | 256   | 18.8 | 5  | 11.6 | 390   | 16.6 |

335 **Table 3. Proportions exposed to MTV Down South 2 and any MTV Shuga campaign, overall**  
 336 **and by age group**

|                                                                                                                                                           | Age group  |             |            |             |              |             |
|-----------------------------------------------------------------------------------------------------------------------------------------------------------|------------|-------------|------------|-------------|--------------|-------------|
|                                                                                                                                                           | 15-19      |             | 20-24      |             | Total        |             |
|                                                                                                                                                           | years      | years       | years      | years       |              |             |
|                                                                                                                                                           | (N=1079)   | (N=2352)    | (N=1079)   | (N=2352)    | (N=3431)     |             |
|                                                                                                                                                           | n          | %           | n          | %           | n            | %           |
| <b><i>MTV Shuga Down South 2 (MTV DS2)</i></b>                                                                                                            |            |             |            |             |              |             |
| Ever watched MTV DS2 on TV, MTV website or YouTube                                                                                                        | 100        | 9.3         | 138        | 5.9         | 238          | 6.9         |
| Ever listened to MTV DS2 on the radio                                                                                                                     | 29         | 2.7         | 42         | 1.8         | 71           | 2.1         |
| Read the MTV Shuga DS2 graphic novel                                                                                                                      | 140        | 13.0        | 204        | 8.7         | 344          | 10.0        |
| Watched the documentary called MTV Shuga in real life that was broadcast at the end of DS2                                                                | 144        | 13.3        | 242        | 10.3        | 386          | 11.3        |
| Attended small group discussion facilitated by a peer educator (at a clinic, school, university, TVET or somewhere else) on DS2 anywhere                  | 182        | 16.9        | 331        | 14.1        | 513          | 15.0        |
| Attended a community event on DS2 anywhere                                                                                                                | 107        | 9.9         | 185        | 7.9         | 292          | 8.5         |
| <b>Exposure to MTV DS2: Said Yes to at least one of the above (primary exposure measure)</b>                                                              | <b>309</b> | <b>28.6</b> | <b>518</b> | <b>22.0</b> | <b>827</b>   | <b>24.1</b> |
| <b><i>Any MTV Shuga campaign</i></b>                                                                                                                      |            |             |            |             |              |             |
| Ever watched MTV Shuga: Down South 1 or 2 on TV, MTV Shuga website or YouTube                                                                             | 368        | 34.1        | 666        | 28.3        | 1,034        | 30.1        |
| Ever listened to MTV Shuga: Down South on the radio                                                                                                       | 132        | 12.2        | 201        | 8.5         | 333          | 9.7         |
| Read the MTV Shuga DS2 graphic novel                                                                                                                      | 140        | 13.0        | 204        | 8.7         | 344          | 10.0        |
| Watched the documentary called MTV Shuga in real life that was broadcast at the end of DS2                                                                | 144        | 13.3        | 242        | 10.3        | 386          | 11.3        |
| Attended small group discussion facilitated by a peer educator (at a clinic, school, university, TVET or somewhere else) on DS2 anywhere                  | 182        | 16.9        | 331        | 14.1        | 513          | 15.0        |
| Attended a community event on DS2 anywhere                                                                                                                | 107        | 9.9         | 185        | 7.9         | 292          | 8.5         |
| Watched the MTV preview show called 16 and Pregnant                                                                                                       | 329        | 30.5        | 527        | 22.4        | 856          | 24.9        |
| Watched MTV PSA spots (Public Service Announcements) short MTV videos with health messages                                                                | 215        | 19.9        | 381        | 16.2        | 596          | 17.4        |
| Watched any MTV Shuga Alone Together episodes on YouTube or the MTV Shuga website                                                                         | 79         | 7.3         | 201        | 8.5         | 280          | 8.2         |
| Searched for information on HIV on the MTV Shuga website (since this was a multiple choice question, any selection of MTV Shuga website implies exposure) | 79         | 7.3         | 131        | 5.6         | 210          | 6.1         |
| Answered a polling question about a MTV Shuga: Down South episode                                                                                         | 110        | 10.2        | 157        | 6.7         | 267          | 7.8         |
| Ever posted any comments about an episode of MTV Shuga: Down South Season 2                                                                               | 119        | 11.0        | 175        | 7.4         | 294          | 8.6         |
| <b>Watched/accessed/participated in any MTV Shuga videos/shows/resources (secondary exposure measure)</b>                                                 | <b>539</b> | <b>50.0</b> | <b>948</b> | <b>40.3</b> | <b>1,487</b> | <b>43.3</b> |

337 Table 4. Factors associated with exposure to MTV Down South 2 and any MTV Shuga campaign

|                                            | Exposure to Down South 2 |              |                       |                                              |           | Exposure to any MTV Shuga campaign |              |                       |                                              |           |
|--------------------------------------------|--------------------------|--------------|-----------------------|----------------------------------------------|-----------|------------------------------------|--------------|-----------------------|----------------------------------------------|-----------|
|                                            | Total<br>N               | Outcome<br>n | Row %<br>Outcome<br>% | age-adjusted OR <sup>†</sup><br>aOR (95% CI) |           | Total<br>N                         | Outcome<br>n | Row %<br>Outcome<br>% | age-adjusted OR <sup>†</sup><br>aOR (95% CI) |           |
| <b>Overall</b>                             | 3,198                    | 805          | 25.2                  |                                              |           | 3,198                              | 1,458        | 45.6                  |                                              |           |
| <b>Age group</b>                           |                          |              |                       |                                              |           |                                    |              |                       |                                              |           |
| 15-19                                      | 988                      | 300          | 30.4                  | 1                                            |           | 988                                | 527          | 53.3                  | 1                                            |           |
| 20-24                                      | 2,210                    | 505          | 22.9                  | 0.68                                         | 0.57 0.80 | 2,210                              | 931          | 42.1                  | 0.64                                         | 0.55 0.74 |
| <b>Gender</b>                              |                          |              |                       |                                              |           |                                    |              |                       |                                              |           |
| Male                                       | 1,233                    | 257          | 20.8                  | 1                                            |           | 1,233                              | 455          | 36.9                  | 1                                            |           |
| Female                                     | 1,874                    | 538          | 28.7                  | 1.50                                         | 1.27 1.78 | 1,874                              | 984          | 52.5                  | 1.86                                         | 1.61 2.16 |
| Other                                      | 91                       | 10           | 11.0                  | 0.42                                         | 0.21 0.82 | 91                                 | 19           | 20.9                  | 0.39                                         | 0.23 0.66 |
| <b>Current schooling/employment status</b> |                          |              |                       |                                              |           |                                    |              |                       |                                              |           |
| In school (primary/secondary)              | 653                      | 223          | 34.2                  | 1                                            |           | 653                                | 386          | 59.1                  |                                              |           |
| TVET <sup>†</sup>                          | 921                      | 120          | 13.0                  | 0.31                                         | 0.23 0.42 | 921                                | 196          | 21.3                  | 0.2                                          | 0.16 0.26 |
| University                                 | 1,094                    | 369          | 33.7                  | 1.06                                         | 0.83 1.35 | 1,094                              | 646          | 59                    | 1.08                                         | 0.85 1.36 |
| Other                                      | 428                      | 78           | 18.2                  | 0.47                                         | 0.34 0.65 | 428                                | 191          | 44.6                  | 0.61                                         | 0.46 0.8  |
| Unknown                                    | 102                      | 15           | 14.7                  | 0.35                                         | 0.2 0.62  | 102                                | 39           | 38.2                  | 0.45                                         | 0.29 0.69 |
| <b>Language spoken at home</b>             |                          |              |                       |                                              |           |                                    |              |                       |                                              |           |
| English                                    | 231                      | 74           | 32.0                  | 1                                            |           | 231                                | 133          | 57.6                  | 1                                            |           |
| isiXhosa                                   | 2,563                    | 629          | 24.5                  | 0.71                                         | 0.53 0.96 | 2,563                              | 1,129        | 44.0                  | 0.6                                          | 0.46 0.79 |
| Zulu                                       | 216                      | 65           | 30.1                  | 0.89                                         | 0.59 1.33 | 216                                | 116          | 53.7                  | 0.83                                         | 0.57 1.21 |
| Other <sup>§</sup>                         | 188                      | 37           | 19.7                  | 0.52                                         | 0.33 0.81 | 188                                | 80           | 42.6                  | 0.54                                         | 0.36 0.8  |
| <b>Urban/Rural residence</b>               |                          |              |                       |                                              |           |                                    |              |                       |                                              |           |
| Urban setting                              | 2,741                    | 686          | 25.0                  | 1                                            |           | 2,741                              | 1,232        | 44.9                  | 1                                            |           |
| Rural setting                              | 255                      | 81           | 31.8                  | 1.37                                         | 1.04 1.81 | 255                                | 152          | 59.6                  | 1.78                                         | 1.37 2.32 |
| Unknown                                    | 202                      | 38           | 18.8                  | 0.66                                         | 0.45 0.94 | 202                                | 74           | 36.6                  | 0.66                                         | 0.49 0.89 |
| <b>Province</b>                            |                          |              |                       |                                              |           |                                    |              |                       |                                              |           |
| Eastern Cape (EC) - Mthatha                | 2,305                    | 573          | 24.9                  | 1                                            |           | 2,305                              | 969          | 42.0                  | 1                                            |           |
| Eastern Cape - O.R. Tambo or other EC      | 321                      | 94           | 29.3                  | 1.22                                         | 0.94 1.58 | 321                                | 189          | 58.9                  | 1.93                                         | 1.52 2.45 |

|                                                                             |       |     |      |      |      |      |       |     |      |      |      |       |
|-----------------------------------------------------------------------------|-------|-----|------|------|------|------|-------|-----|------|------|------|-------|
| Other provinces                                                             | 509   | 120 | 23.6 | 0.89 | 0.71 | 1.12 | 509   | 265 | 52.1 | 1.43 | 1.18 | 1.74  |
| Unknown                                                                     | 63    | 18  | 28.6 | 1.18 | 0.68 | 2.06 | 63    | 35  | 55.6 | 1.68 | 1.02 | 2.79  |
| <b>Food insecurity</b>                                                      |       |     |      |      |      |      |       |     |      |      |      |       |
| Never/rarely                                                                | 1,785 | 371 | 20.8 | 1    |      |      | 1,785 | 735 | 41.2 | 1    |      |       |
| Sometimes                                                                   | 1,048 | 321 | 30.6 | 1.71 | 1.44 | 2.04 | 1,048 | 550 | 52.5 | 1.61 | 1.38 | 1.88  |
| Often/always                                                                | 204   | 77  | 37.7 | 2.31 | 1.70 | 3.14 | 204   | 121 | 59.3 | 2.09 | 1.55 | 2.81  |
| Unknown                                                                     | 161   | 36  | 22.4 | 1.05 | 0.71 | 1.56 | 161   | 52  | 32.3 | 0.65 | 0.46 | 0.91  |
| <b>Household media assets index</b>                                         |       |     |      |      |      |      |       |     |      |      |      |       |
| Low                                                                         | 1,176 | 320 | 27.2 | 1    |      |      | 1,176 | 570 | 48.5 | 1    |      |       |
| Medium                                                                      | 1,048 | 217 | 20.7 | 0.72 | 0.59 | 0.88 | 1,048 | 439 | 41.9 | 0.79 | 0.67 | 0.94  |
| High                                                                        | 974   | 268 | 27.5 | 1.03 | 0.85 | 1.25 | 974   | 449 | 46.1 | 0.92 | 0.78 | 1.09  |
| <b>Individual media assets index</b>                                        |       |     |      |      |      |      |       |     |      |      |      |       |
| Low                                                                         | 1,190 | 250 | 21.0 | 1    |      |      | 1,190 | 503 | 42.3 | 1    |      |       |
| Medium                                                                      | 1,218 | 341 | 28.0 | 1.50 | 1.24 | 1.81 | 1,218 | 638 | 52.4 | 1.54 | 1.31 | 1.82  |
| High                                                                        | 790   | 214 | 27.1 | 1.47 | 1.19 | 1.82 | 790   | 317 | 40.1 | 0.96 | 0.80 | 1.16  |
| <b>Relationship status</b>                                                  |       |     |      |      |      |      |       |     |      |      |      |       |
| Not in a relationship                                                       | 1,453 | 287 | 19.8 | 1    |      |      | 1,453 | 528 | 36.3 | 1    |      |       |
| In a relationship                                                           | 1,221 | 313 | 25.6 | 1.45 | 1.21 | 1.74 | 1,221 | 604 | 49.5 | 1.80 | 1.54 | 2.10  |
| Ever married/lived with someone                                             | 96    | 24  | 25.0 | 1.45 | 0.90 | 2.35 | 96    | 45  | 46.9 | 1.68 | 1.11 | 2.56  |
| Unknown                                                                     | 428   | 181 | 42.3 | 2.96 | 2.35 | 3.73 | 428   | 281 | 65.7 | 3.34 | 2.66 | 4.20  |
| <b>Ever had sex</b>                                                         |       |     |      |      |      |      |       |     |      |      |      |       |
| No                                                                          | 1,291 | 162 | 12.5 | 1    |      |      | 1,291 | 286 | 22.2 | 1    |      |       |
| Yes                                                                         | 1,330 | 453 | 34.1 | 3.84 | 3.13 | 4.70 | 1,330 | 868 | 65.3 | 7.52 | 6.28 | 9.01  |
| Prefer not to say                                                           | 172   | 12  | 7.0  | 0.48 | 0.26 | 0.89 | 172   | 27  | 15.7 | 0.57 | 0.37 | 0.89  |
| Unknown                                                                     | 405   | 178 | 44.0 | 5.41 | 4.18 | 7.00 | 405   | 277 | 68.4 | 7.78 | 6.05 | 10.01 |
| <b>Called a helpline or searched for information on HIV on the internet</b> |       |     |      |      |      |      |       |     |      |      |      |       |
| No                                                                          | 1,667 | 296 | 17.8 | 1    |      |      | 1,667 | 495 | 29.7 | 1    | 1    | 1     |
| Yes                                                                         | 1,352 | 456 | 33.7 | 2.35 | 1.98 | 2.78 | 1,352 | 888 | 65.7 | 4.57 | 3.91 | 5.33  |
| Unknown                                                                     | 179   | 53  | 29.6 | 1.84 | 1.30 | 2.60 | 179   | 75  | 41.9 | 1.59 | 1.15 | 2.18  |

338 <sup>†</sup>OR = Odds Ratio; <sup>‡</sup>TVET - Technical and Vocational Education and Training; <sup>§</sup>includes 5 respondents whose language was unknown

339  
340

**Table 5. Associations between exposure to MTV Down South 2 (A) and any MTV Shuga campaign (B) with HIV self-testing and PrEP outcomes**

|                                                                                             | Exposed | Total | Outcome | Row %<br>Outcome | Age Adjusted OR <sup>†</sup> |          |            | Fully adjusted <sup>‡</sup> OR <sup>†</sup><br>(overall) |          |            |      |
|---------------------------------------------------------------------------------------------|---------|-------|---------|------------------|------------------------------|----------|------------|----------------------------------------------------------|----------|------------|------|
|                                                                                             |         | N     | n       | %                | aOR                          | (95% CI) | p<br>value | aOR                                                      | (95% CI) | p<br>value |      |
| <b>(A) MTV Down South 2</b>                                                                 |         |       |         |                  |                              |          |            |                                                          |          |            |      |
| <b>HIV Status</b>                                                                           |         |       |         |                  |                              |          |            |                                                          |          |            |      |
| <b>Knowledge of HIV status (N=3,198)</b>                                                    | No      | 2,393 | 828     | 34.6             | 1                            |          |            | 1                                                        |          |            |      |
|                                                                                             | Yes     | 805   | 466     | 57.9             | 2.75                         | 2.33     | 3.25       | <0.001                                                   | 2.06     | 1.64       | 2.58 |
| <b>HIV Self Testing/Screening outcomes</b>                                                  |         |       |         |                  |                              |          |            |                                                          |          |            |      |
| <b>Ever heard about HIV Self Screening Kit (N=2,727)</b>                                    | No      | 2,077 | 589     | 28.4             | 1                            |          |            | 1                                                        |          |            |      |
|                                                                                             | Yes     | 650   | 387     | 59.5             | 3.90                         | 3.24     | 4.70       | <0.001                                                   | 1.99     | 1.61       | 2.47 |
| <b>Ever tested for HIV using HIV Self Screening Kit (N=2,694)</b>                           | No      | 2,049 | 211     | 10.3             | 1                            |          |            | 1                                                        |          |            |      |
|                                                                                             | Yes     | 645   | 186     | 28.8             | 3.65                         | 2.92     | 4.57       | <0.001                                                   | 2.49     | 1.95       | 3.19 |
| <b>Tested for HIV using HIV Self Screening Kit in the last 12 months (N=2,689)</b>          | No      | 2,044 | 132     | 6.5              | 1                            |          |            | 1                                                        |          |            |      |
|                                                                                             | Yes     | 645   | 136     | 21.1             | 4.12                         | 3.17     | 5.35       | <0.001                                                   | 2.61     | 1.97       | 3.47 |
| <b>Demand for HIV Self Screening - to screen oneself (N=2,213)<sup>§</sup></b>              | No      | 1,786 | 1,498   | 83.9             | 1                            |          |            | 1                                                        |          |            |      |
|                                                                                             | Yes     | 427   | 335     | 78.5             | 0.78                         | 0.60     | 1.02       | 0.069                                                    | 0.80     | 0.59       | 1.09 |
| <b>Demand for HIV Self Screening - willing to give kit to partner (N=2,188)<sup>§</sup></b> | No      | 1,774 | 1,502   | 84.7             | 1                            |          |            | 1                                                        |          |            |      |
|                                                                                             | Yes     | 414   | 330     | 79.7             | 0.79                         | 0.60     | 1.04       | 0.092                                                    | 0.86     | 0.63       | 1.17 |
| <b>PrEP Outcomes</b>                                                                        |         |       |         |                  |                              |          |            |                                                          |          |            |      |
| <b>Ever Heard About PrEP (N=2,649)</b>                                                      | No      | 2,023 | 548     | 27.1             | 1                            |          |            | 1                                                        |          |            |      |
|                                                                                             | Yes     | 626   | 323     | 51.6             | 2.93                         | 2.43     | 3.53       | <0.001                                                   | 1.90     | 1.53       | 2.35 |
| <b>Demand for PrEP - willing to take PrEP everyday (N=2,284)</b>                            | No      | 1,747 | 1,394   | 79.8             | 1                            |          |            | 1                                                        |          |            |      |
|                                                                                             | Yes     | 537   | 457     | 85.1             | 1.54                         | 1.17     | 2.01       | 0.002                                                    | 1.31     | 0.97       | 1.76 |
| <b>Sexual behaviour outcomes</b>                                                            |         |       |         |                  |                              |          |            |                                                          |          |            |      |
| <b>Ever had sex (N=2,621)</b>                                                               | No      | 2,006 | 877     | 43.7             | 1                            |          |            | 1                                                        |          |            |      |
|                                                                                             | Yes     | 615   | 453     | 73.7             | 3.95                         | 3.22     | 4.85       | <0.001                                                   | 2.86     | 2.19       | 3.72 |



|                                                                                       |     |       |       |      |      |      |      |        |      |      |      |        |
|---------------------------------------------------------------------------------------|-----|-------|-------|------|------|------|------|--------|------|------|------|--------|
| Had sex in the past 12 months (N=2,492)                                               | No  | 1,918 | 717   | 37.4 | 1    |      |      |        | 1    |      |      |        |
|                                                                                       | Yes | 574   | 366   | 63.8 | 3.25 | 2.66 | 3.96 | <0.001 | 2.13 | 1.65 | 2.74 | <0.001 |
| Condom use at last sex with current or last partner (in the last 12 months) (N=1,056) | No  | 699   | 410   | 58.7 | 1    |      |      |        | 1    |      |      |        |
|                                                                                       | Yes | 357   | 234   | 65.5 | 1.35 | 1.03 | 1.76 | 0.028  | 1.42 | 1.07 | 1.89 | 0.014  |
| <b>(B) Any MTV Shuga campaign</b>                                                     |     |       |       |      |      |      |      |        |      |      |      |        |
| <b>HIV status</b>                                                                     |     |       |       |      |      |      |      |        |      |      |      |        |
| Knowledge of HIV status (N=3,198)                                                     | No  | 1,740 | 431   | 24.8 | 1    |      |      |        | 1    |      |      |        |
|                                                                                       | Yes | 1,458 | 863   | 59.2 | 4.84 | 4.15 | 5.66 | <0.001 | 2.52 | 2.04 | 3.12 | <0.001 |
| <b>HIV Self Testing/Screening outcomes</b>                                            |     |       |       |      |      |      |      |        |      |      |      |        |
| Ever heard about HIV Self Screening Kit (N=2,727)                                     | No  | 1,509 | 284   | 18.8 | 1    |      |      |        | 1    |      |      |        |
|                                                                                       | Yes | 1,218 | 692   | 56.8 | 6.12 | 5.12 | 7.31 | <0.001 | 3.00 | 2.45 | 3.68 | <0.001 |
| Ever tested for HIV using HIV Self Screening Kit (N=2,694)                            | No  | 1,483 | 115   | 7.8  | 1    |      |      |        | 1    |      |      |        |
|                                                                                       | Yes | 1,211 | 282   | 23.3 | 3.75 | 2.97 | 4.74 | <0.001 | 2.15 | 1.64 | 2.81 | <0.001 |
| Tested for HIV using HIV Self Screening Kit in the last 12 months (N=2,689)           | No  | 1,478 | 70    | 4.7  | 1    |      |      |        | 1    |      |      |        |
|                                                                                       | Yes | 1,211 | 198   | 16.4 | 4.19 | 3.14 | 5.58 | <0.001 | 2.23 | 1.61 | 3.07 | <0.001 |
| Demand for HIV Self Screening - to screen oneself (N=2,213) <sup>§</sup>              | No  | 1,342 | 1,143 | 85.2 | 1    |      |      |        | 1    |      |      |        |
|                                                                                       | Yes | 871   | 690   | 79.2 | 0.74 | 0.59 | 0.92 | 0.008  | 0.73 | 0.55 | 0.97 | 0.031  |
| Demand for HIV Self Screening - willing to give kit to partner (N=2,188) <sup>§</sup> | No  | 1,338 | 1,145 | 85.6 | 1    |      |      |        | 1    |      |      |        |
|                                                                                       | Yes | 850   | 687   | 80.8 | 0.78 | 0.62 | 0.99 | 0.041  | 0.87 | 0.65 | 1.17 | 0.364  |
| <b>PrEP Outcomes</b>                                                                  |     |       |       |      |      |      |      |        |      |      |      |        |
| Ever Heard About PrEP (N=2,649)                                                       | No  | 1,469 | 251   | 17.1 | 1    |      |      |        | 1    |      |      |        |
|                                                                                       | Yes | 1,180 | 620   | 52.5 | 5.63 | 4.7  | 6.74 | <0.001 | 2.8  | 2.26 | 3.47 | <0.001 |
| Demand for PrEP - willing to take PrEP everyday (N=2,284)                             | No  | 1,292 | 1,011 | 78.3 | 1    |      |      |        | 1    |      |      |        |
|                                                                                       | Yes | 992   | 840   | 84.7 | 1.65 | 1.32 | 2.06 | <0.001 | 1.26 | 0.96 | 1.65 | 0.095  |
| <b>Sexual behaviour outcomes</b>                                                      |     |       |       |      |      |      |      |        |      |      |      |        |
| Ever had sex (N=2,621)                                                                | No  | 1,467 | 462   | 31.5 | 1    |      |      |        | 1    |      |      |        |
|                                                                                       | Yes | 1,154 | 868   | 75.2 | 7.85 | 6.53 | 9.45 | <0.001 | 4.29 | 3.36 | 5.48 | <0.001 |
| Had sex in the past 12 months (N=2,492)                                               | No  | 1,419 | 377   | 26.6 | 1    |      |      |        | 1    |      |      |        |
|                                                                                       | Yes | 1,073 | 706   | 65.8 | 6.21 | 5.18 | 7.46 | <0.001 | 3.03 | 2.39 | 3.84 | <0.001 |

**Condom use at last sex with current or last partner (in the last 12 months) (N=1,056)**

|     |     |     |      |      |      |      |       |      |      |      |       |  |
|-----|-----|-----|------|------|------|------|-------|------|------|------|-------|--|
| No  | 365 | 206 | 56.4 | 1    |      |      |       |      | 1    |      |       |  |
| Yes | 691 | 438 | 63.4 | 1.34 | 1.04 | 1.74 | 0.025 | 1.61 | 1.21 | 2.13 | 0.001 |  |

341 <sup>†</sup>OR-Odds Ratio; <sup>‡</sup>all models (except models on sexual behaviours) include the following variables: main exposure, age, gender, schooling, home language, rural/urban  
 342 setting, province, food insecurity, household media index, individual media index, relationship status, ever had sex, and exposure to other non-MTV resources; models for  
 343 sexual behaviours include all the above variables except ever had sex; <sup>§</sup>among those who had never used an HIV self-test before.  
 344

## 345 Discussion

346 Through a mixed methods evaluation of MTV Shuga’s multimedia edutainment campaign,  
347 we found evidence consistent with a causal impact of the campaign on important HIV  
348 prevention outcomes among young people in South Africa. Among 3,431 15-24 year-old  
349 participants of an online survey, based predominantly in Eastern Cape province, substantial  
350 proportions had been exposed to MTV Shuga: one-quarter had engaged with the most  
351 recent MTV Shuga series (Down South 2; DS2) and 43% with any component or past series  
352 of the MTV Shuga campaign. Exposure to DS2 and the wider MTV Shuga campaign was  
353 strongly associated with the primary outcome of the study, knowledge of HIV status, as well  
354 as increased awareness and use of HIV self-testing (HIVST) and knowledge of PrEP.  
355 Respondents’ interest to use HIVST and PrEP was very high overall; it was higher among  
356 MTV Shuga audiences for the younger (15-19 year-olds) but not among older respondents  
357 aged 20-24 years.

358  
359 An embedded qualitative study offered insights into ways in which MTV Shuga DS2 may  
360 have influenced these outcomes. DS2 enhanced young people’s capability and motivation to  
361 adopt HIV prevention behaviours, while its influence on opportunity (e.g., to access  
362 prevention services) was more limited.[20] Some viewers were introduced to HIV self-  
363 testing and PrEP for the first time through the show, and greater awareness helped to  
364 reduce fear and boost confidence to learn their HIV status and seek further HIV information  
365 and services. For others, HIV information that had previously seemed abstract or academic  
366 was made real and relevant in DS2 scenarios and storylines, with viewers given an  
367 opportunity to observe behaviours that were typically kept private, e.g., couples self-testing  
368 together at home. This was evidence of observational learning, consistent with Social  
369 Learning Theory.[22] While not all felt they currently needed to use resources like HIV self-  
370 testing and PrEP, they imagined future circumstances in which they would benefit from  
371 them. Some reflected on options presented by DS2 storylines, to think through their  
372 personal preferences for HIV prevention, and this may help to explain the differences in  
373 demand for HIV self-testing by age group, e.g., if older viewers generally valuing the support  
374 available from provider-led testing and younger adolescents preferring the privacy of self-  
375 testing at home. For some, the scenes on HIVST and PrEP were too short or unclear to have  
376 any influence.

377  
378 The findings suggest ways in which a popular, immersive multimedia campaign like MTV  
379 Shuga can accelerate achievement of HIV prevention goals for young people. MTV Shuga’s  
380 influence is consistent with a person-centred approach to HIV prevention: through engaging  
381 storylines and characters, young people are offered accurate and relevant information on  
382 HIV prevention options and enabled to make their own choices (in contrast to assuming that  
383 young people are ‘passive beneficiaries’).[23] Respecting personal choice and agency in this  
384 way can help people to adopt HIV prevention choices at different time points, as their needs  
385 and situations change, analogous to offering a ‘contraceptive method mix’ reflecting users’  
386 diverse preferences and circumstances.[24] This can help young people to prepare for  
387 changes that may increase their HIV risk, for example, to know prevention options before  
388 their first sexual experience. In southern Africa, many young people do not engage with SRH  
389 services until they are already sexually active, pregnant or married, at which point many are  
390 already at risk for HIV/STI (in settings where HIV incidence escalates from an early age) [25,

391 26]. The first sexual experience is often one in which young people are not well prepared,  
392 e.g., with information, contraception, condoms or HIV/STI testing.[27] While MTV Shuga  
393 audiences were more likely to have had sex than those who never engaged with the  
394 campaign, viewers who had never had sex felt more aware and prepared for HIV prevention  
395 choices once they became sexually active. Acquiring a new sexual partner is another high-  
396 risk transition point for young people, for which they can be prepared in advance, and MTV  
397 Shuga viewers anticipated prevention choices they could make with new partners, e.g., to  
398 use PrEP with a partner who is living with HIV.

399

400 The benefits of MTV Shuga may be greatest for those who are most connected to digital  
401 media for access to the dramatic television series with high production values, and the  
402 ability to be immersed in all episodes. However, in the study setting of Mthatha, more  
403 respondents reported experiencing 'offline' components of the DS2 campaign than the  
404 televised or internet-streamed episodes. Many had engaged with community-based viewing  
405 events, peer-led Shuga discussions, and the DS2 graphic novels distributed through schools.  
406 Our qualitative research found that Shuga opened up dialogue about sex and HIV with  
407 peers, parents and partners, and this ability for Shuga to stimulate real-life discussions can  
408 happen across all its formats. Also, some viewers were inspired to become 'advocates' for  
409 the new HIV prevention information they learned via DS2, suggesting that, by reaching the  
410 most digitally connected young people, MTV Shuga can inspire early adopters of HIV  
411 preventive innovations, who are well placed to diffuse those messages to peers online and  
412 in real life.[28]

413

414 An important limitation to a multimedia campaign like MTV Shuga is its lack of influence on  
415 supply of services, either actual or perceived supply, including the HIV prevention  
416 technologies it promoted through DS2. Viewers were typically sceptical about the  
417 opportunity to access HIV self-testing and PrEP in their area of Eastern Cape, despite recent  
418 investments in HIV self-test and PrEP distribution.[18] The survey showed that DS2 viewers  
419 were more likely than non-viewers to have paid a fee for their last HIV self-test kit,  
420 suggesting that the ability to pay or access a pharmacy may help to explain the observed  
421 differences in use of self-testing, even if MTV Shuga boosted motivation for HIV testing. To  
422 ensure equitable access to prevention tools and services, media campaigns that generate  
423 demand should be directly linked to distribution efforts that are available and acceptable to  
424 young people.

425

426 The findings are consistent with a small but growing number of studies that demonstrate  
427 benefits of MTV Shuga. The afore-mentioned trial in Nigeria found increases in HIV and STI  
428 testing in communities randomly selected to receive group showings of MTV Shuga  
429 episodes.[15] Among a cohort of adolescent girls and young women in rural KwaZulu,  
430 exposure to MTV Shuga was relatively low by 2019 (~15% of randomly sampled 15-24 year  
431 old females), but associated with a range of sexual and reproductive health benefits  
432 (although not with HIV testing, perhaps due to regular HIV surveillance in the study  
433 area).[17] In this study, the higher prevalence of exposure to MTV Shuga (>40%) may be due  
434 to better media access as well as more concerted efforts to offer MTV Shuga activities  
435 offline, through schools and communities in Eastern Cape.

436

437 Our study had a number of limitations. It is likely that the sample does not represent the  
438 general population of Eastern Cape, but is skewed in favour of those young people who  
439 frequently engage with digital media. Compared to a representative sample in urban areas  
440 of Eastern Cape in 2016, cell-phone ownership was similar among 20-24 year olds, but  
441 higher among our younger respondents (15-19 years).[29] This may reflect recent growth in  
442 phone ownership among teenagers, throughout South Africa and Mthatha. Only 1% of our  
443 study participants reported that they never used the internet. This may reflect the virtual,  
444 internet-based study methods we used to comply with COVID-19 restrictions in South Africa  
445 and avoid SARS-CoV-2 transmission risk, however, connectedness and social media use is  
446 rapidly growing across South Africa. A recent study in Mthatha described young people's  
447 social media use as "pervasive".[30] We tried to minimise cost barriers to participation, by  
448 making the internet survey free to access (through reverse-charging) and providing data  
449 credit to all participants, however, participation was most likely easier for those with digital  
450 devices, more reliable internet access and greater literacy.

451  
452 Our design also relied on self-reported measures of MTV Shuga engagement and  
453 misclassification may have under- or over-estimated exposure. Many respondents opted  
454 not to answer some questions, particularly the questions on sexual experiences, suggesting  
455 that online surveys are not ideal for collecting such private information from young people,  
456 even if anonymised. However, the study findings were largely unchanged in sensitivity  
457 analyses with imputation of missing values. Another limitation is that the increased  
458 associations observed may be explained by unknown or unmeasured confounders,  
459 especially as the questionnaire length was kept as short as possible for online use.  
460 Nevertheless, associations remained strong after accounting for numerous potential  
461 confounders, including other sources of HIV prevention information and campaigns, and  
462 were consistent across multiple outcomes. Also, the strengths of associations observed  
463 across outcomes, and the connections between mechanisms (identified in qualitative  
464 analysis) and the observed outcomes offered evidence of causality consistent with a realist  
465 evaluation.[31]

466

## 467 Conclusions

468 As new HIV testing and PrEP options become available, we sought evidence of a multimedia  
469 edutainment campaign's influence on awareness and demand for such tools, among young  
470 men and women in a high-prevalence setting of South Africa. Together, findings from a large  
471 online survey and embedded qualitative research are consistent with a causal impact of  
472 MTV Shuga on young people's awareness and use of HIV self-testing and PrEP, and  
473 knowledge of their own HIV status, although we cannot exclude other possible explanations  
474 for the observed associations. With online and offline components, the '360-degree' media  
475 campaign reached sizeable proportions of young people through TV, internet, schools and  
476 community events, especially adolescent girls – a group at particularly high risk of HIV  
477 acquisition in high-burden countries. Positive effects were equally strong for females and  
478 males, and the diverse characters and storylines enabled MTV Shuga viewers to reflect on  
479 their personal needs and HIV prevention choices. With stronger, more direct links to the  
480 supply and distribution of prevention tools like self-test kits and PrEP, growing use of digital  
481 media among young people, and the potential for early adopters to diffuse innovation, a

482 popular edutainment campaign like MTV Shuga has an important role to play in closing age  
483 and gender gaps in HIV testing and prevention goals.

## Additional information

### Competing interests

The authors declare no competing interests.

### Authors' contributions

IB, SC, SS, CC, DK, VB co-designed the study protocol, and CC, DK, DOD and VB managed the data collection. SS led the survey questionnaire development and DOD programmed the questionnaire. SM led the management and analysis of survey data, VB led the analysis of qualitative data, and IB led the triangulation. IB wrote the first draft, all authors contributed to revisions and reviewed the final draft.

### Acknowledgements

The authors wish to thank all the young people who contributed their time to this study. We thank Michel Carael, Oona Campbell, Hasina Subedar, Sian Floyd, Heather Ingold, Ombeni Mwerindi, Rachel Baggaley, Kathering Fielding and Melissa Newman for valuable ideas to strengthen this research. We are grateful to Antonio Duran-Aparicio for all the support to make this project possible. We acknowledge the dedication of MTV Shuga peer educators and coordinators (Yvonne Diogo, Lesedi Thwala) in South Africa and appreciate the trust of the MTV Staying Alive Foundation, especially Georgia Arnold and Sara Piot.

### Funding

This work was supported through a grant from Unitaid through a sub-contract from MTV Staying Alive Foundation to London School of Hygiene & Tropical Medicine, grant 1317919.

### Additional files

Figure S1. Activities in MTV Shuga Down South 2 360-degree media campaign

Figure S2. Hypothesised common causes of MTV Shuga exposure and HIV outcomes

Table S1. Factors associated with exposure to MTV Down South 2 and any MTV Shuga campaign, among 15-19 year-olds (A) and 20-24 year-olds (B)

Table S2. Associations between exposure to MTV Down South 2 (A) and any MTV Shuga campaign (B) with HIV self-testing and PrEP outcomes: Age specific estimates

Table S3. Results from multiple imputation with primary exposure: m=10 imputations

Table S4. Experiences with HIV self-testing and PrEP, among those ever and never exposed to MTV Shuga DS2

Table S5. Mechanisms by which MTV Shuga Down South 2 influenced behaviour through Capability, Motivation and Opportunity to improve HIV self-testing and PrEP outcomes: themes emerging from deductive analysis of qualitative research in Mthatha, Eastern Cape

Table S6. Evidence of broader social mechanisms by which MTV Shuga DS2 influenced HIV self-testing and PrEP outcomes: themes emerging from open code analysis of qualitative research in Mthatha, Eastern Cape

File S1. Online survey questionnaire

File S2. Topic guides for the qualitative research activities



## References

1. Gupta-Wright A, Barnabas RV, Ingold H et al. HIV self-testing: lessons learnt and priorities for adaptation in a shifting landscape. *BMJ Glob Health* 2021;6(Suppl 4).
2. UNAIDS. Knowledge is Power: Know your status, know your viral load. 2018.
3. Giguere K, Eaton JW, Marsh K et al. Trends in knowledge of HIV status and efficiency of HIV testing services in sub-Saharan Africa, 2000-20: a modelling study using survey and HIV testing programme data. *Lancet HIV* 2021;8(5):e284-e93.
4. Wong VJ, Murray KR, Phelps BR et al. Adolescents, young people, and the 90-90-90 goals: a call to improve HIV testing and linkage to treatment. *AIDS* 2017;31 Suppl 3:S191-S4.
5. Wong V, Jenkins E, Ford N et al. To thine own test be true: HIV self-testing and the global reach for the undiagnosed. *J Int AIDS Soc* 2019;22 Suppl 1:e25256.
6. Indravudh PP, Sibanda EL, d'Elbee M et al. 'I will choose when to test, where I want to test': investigating young people's preferences for HIV self-testing in Malawi and Zimbabwe. *AIDS* 2017;31 Suppl 3:S203-S12.
7. Ashburn K, Antelman G, N'Goran MK et al. Willingness to use HIV self-test kits and willingness to pay among urban antenatal clients in Cote d'Ivoire and Tanzania: a cross-sectional study. *Trop Med Int Health* 2020;25(9):1155-65.
8. Obiezu-Umeh C, Gbajabiamila T, Ezechi O et al. Young people's preferences for HIV self-testing services in Nigeria: a qualitative analysis. *BMC Public Health* 2021;21(1):67.
9. Tonen-Wolyec S, Koyalta D, Mboumba Bouassa RS et al. HIV self-testing in adolescents living in Sub-Saharan Africa. *Med Mal Infect* 2020;50(8):648-51.
10. Celum C, Hosek S, Tsholwana M et al. PrEP uptake, persistence, adherence, and effect of retrospective drug level feedback on PrEP adherence among young women in southern Africa: Results from HPTN 082, a randomized controlled trial. *PLoS Med* 2021;18(6):e1003670.
11. Yoshioka E, Giovenco D, Kuo C et al. "I'm doing this test so I can benefit from PrEP": exploring HIV testing barriers/facilitators and implementation of pre-exposure prophylaxis among South African adolescents. *Afr J AIDS Res* 2020;19(2):101-8.
12. Muhumuza R, Ssemata AS, Kakande A et al. Exploring Perceived Barriers and Facilitators of PrEP Uptake among Young People in Uganda, Zimbabwe, and South Africa. *Arch Sex Behav* 2021;50(4):1729-42.
13. Segal KF, L; Riaz, F; Rodrigues, J; Warren, M. The evolution of oral PrEP access: tracking trends in global oral PrEP use over time. HIV Research for Prevention 2021; Virtual: International AIDS Society; 2021.
14. MTV Staying Alive Foundation 2021 Available from: <https://www.mtvstayingalive.org/campaign/shuga/>.
15. Banerjee A LFE, Orozco V. The Entertaining Way to Behavioral Change. 1st TCD/LSE/ CEPR Workshop in Development Economics; Dublin2017.
16. Orozco-Olvera V, Shen F, Cluver L. The effectiveness of using entertainment education narratives to promote safer sexual behaviors of youth: A meta-analysis, 1985-2017. *PLoS One* 2019;14(2):e0209969.
17. Shahmanesh MM, N; Chimbindi, N; Zuma, T; Dreyer, J; Birdthistle, I; Floyd, S; . 'MTV Shuga': Mass Media Communication, HSV2 and sexual health in adolescent girls and young women in rural South Africa STI & HIV World Congress (Joint Meeting of the 23rd ISSTD and 20th IUSTI); Vancouver: Sexually Transmitted Infections; 2019.
18. Matsimela K, Sande LA, Mostert C et al. The cost and intermediary cost-effectiveness of oral HIV self-test kit distribution across 11 distribution models in South Africa. *BMJ Glob Health* 2021;6(Suppl 4).
19. Greenland S, Pearl J, Robins JM. Causal diagrams for epidemiologic research. *Epidemiology* 1999;10(1):37-48.

20. Michie S, van Stralen MM, West R. The behaviour change wheel: a new method for characterising and designing behaviour change interventions. *Implement Sci* 2011;6:42.
21. Braun VC, V. Using thematic analysis in psychology. *Qualitative Research in Psychology* 2006;3(2):77-101.
22. A B. Social learning theory. Englewood Cliffs, NJ: Prentice-Hall; 1977.
23. Pantelic M, Stegling C, Shackleton S et al. Power to participants: a call for person-centred HIV prevention services and research. *J Int AIDS Soc* 2018;21 Suppl 7:e25167.
24. Bertrand JT, Ross J, Sullivan TM et al. Contraceptive Method Mix: Updates and Implications. *Glob Health Sci Pract* 2020;8(4):666-79.
25. Nkosi B, Seeley J, Ngwenya N et al. Exploring adolescents and young people's candidacy for utilising health services in a rural district, South Africa. *BMC Health Serv Res* 2019;19(1):195.
26. Sam-Agudu NA, Folayan MO, Ezeanolue EE. Seeking wider access to HIV testing for adolescents in sub-Saharan Africa. *Pediatr Res* 2016;79(6):838-45.
27. Biney AA, Dodoo FN. What are the characteristics of 'sexually ready' adolescents? Exploring the sexual readiness of youth in urban poor Accra. *BMC Public Health* 2016;16:9.
28. Bertrand JT. Diffusion of innovations and HIV/AIDS. *J Health Commun* 2004;9 Suppl 1:113-21.
29. National Department of Health - NDoH SSA-SS, South African Medical Research Council - SAMRC, and ICF. South Africa Demographic and Health Survey 2016. Pretoria, South Africa, and Rockville, Maryland, USA; 2019.
30. Matenda S NG, Rugbeer H. A study of young people's use of social media for social capital in Mthatha, Eastern Cape. *Communitas* 2020;25.
31. Pawson R, Tilley, N. An introduction to scientific realist evaluation. Shadish ECWR, editor: Sage Publications, Inc.; 1997.



Outcome

Agegroup

Knowledge of HIV status

Ever heard about HIV self-testing

Ever used an HIV ST kit

Used an HIVST in the past year

Interested to use an HIVST kit

All

15-19

20-24

Interested to give HIVST kit to a partner

All

15-19

20-24

Ever heard about PrEP

Willing to take PrEP every day

Condom use at last sex

0 .5 1 1.5 2 2.5 3 3.5 4  
adjusted Odds Ratio for association with exposure to Down South 2

Outcome

Agegroup

Knowledge of HIV status

Ever heard about HIV self-testing

Ever used an HIV ST kit

Used an HIVST in the past year

Interested to use an HIVST kit

All

15-19

20-24

Interested to give HIVST kit to a partner

All

15-19

20-24

Ever heard about PrEP

Willing to take PrEP every day

All

15-19

20-24

Condom use at last sex

0 .5 1 1.5 2 2.5 3 3.5 4  
adjusted Odds Ratio for association with exposure to any MTV Campaign

medRxiv preprint doi: <https://doi.org/10.1101/2022.08.18.22281104>; this version posted October 18, 2022. The copyright holder for this preprint (which was not certified by peer review) is the author/funder, who has granted medRxiv a license to display the preprint in perpetuity. It is made available under a [CC-BY-NC-ND 4.0 International license](https://creativecommons.org/licenses/by-nc-nd/4.0/).
